# Supplementary material for: Personal Characteristics Effects on Validation of Self-reported Type 2 Diabetes From a Cross-sectional Survey Among Chinese Adults
Source: PubMed Central journal article supplement (PMC7557172; doi:10.2188/jea.je20190178), 2020-11-05
Supplement: je-30-516-s001.pdf [file je-30-516-s001.pdf]

## **Supplementary Information**

### **Personal characteristics effects on validation of self-reported type 2 diabetes from a cross-sectional survey among Chinese adults**

Hong-Lan Li, Jie Fang, Long-Gang Zhao, Da-Ke Liu, Jing Wang, Li-Hua Han, Yong-Bing Xiang\*

**eTable 1.** Prevalence of diabetes, pre-diabetes, and glycemic control among all subjects using only FPG test (n=4,322)

**eTable 2.** Prevalence of diabetes, pre-diabetes, and glycemic control among subjects using both FPG and HbA1c test (n=708)

**eTable 1.** Prevalence of diabetes, pre-diabetes, and glycemic control among all subjects using only FPG test (n=4,322)

|                                                                                 | number | %    |
|---------------------------------------------------------------------------------|--------|------|
| Prevalence of diabetes                                                          |        |      |
| Diagnosed diabetes (self-reported diabetes)                                     | 608    | 14.1 |
| Undiagnosed diabetes (self-reported no diabetes & FPG $\geq$ 7.0 mmol/L)        | 225    | 5.2  |
| Total diabetes (diagnosed & undiagnosed diabetes)                               | 833    | 19.3 |
| Pre-diabetes                                                                    |        |      |
| Pre-diabetes (self-reported no diabetes & $5.6 \leq$ FPG<7.0 mmol/L)            | 1,133  | 26.2 |
| Glycemic control                                                                |        |      |
| Currently taking diabetes medication in diagnosed diabetes                      | 536    | 88.2 |
| FPG <7.0 mmol/L in diagnosed diabetes                                           | 223    | 36.7 |
| FPG <7.0 mmol/L in diagnosed diabetes with currently taking diabetes medication | 193    | 36.0 |
| FPG <7.0 mmol/L in diagnosed diabetes but no taking diabetes medication         | 30     | 41.7 |

FPG, fasting plasma glucose.

**eTable 2.** Prevalence of diabetes, pre-diabetes, and glycemic control among subjects using both FPG and HbA1c test (n=708)

|                                                                                                      | number | %    |
|------------------------------------------------------------------------------------------------------|--------|------|
| Prevalence of diabetes                                                                               |        |      |
| Diagnosed diabetes (self-reported diabetes)                                                          | 73     | 10.3 |
| Undiagnosed diabetes 1 (self-reported no diabetes & FPG $\geq$ 7.0 mmol/L)                           | 19     | 2.7  |
| Undiagnosed diabetes 2 (self-reported no diabetes & HbA1c $\geq$ 6.5%)                               | 40     | 5.6  |
| Undiagnosed diabetes 3 (self-reported no diabetes & 'FPG $\geq$ 7.0 mmol/L or HbA1c $\geq$ 6.5%')    | 43     | 6.1  |
| Total diabetes (diagnosed & undiagnosed diabetes 3)                                                  | 116    | 16.4 |
| Pre-diabetes                                                                                         |        |      |
| Pre-diabetes 1 (self-reported no diabetes & $5.6 \leq$ FPG<7.0 mmol/L)                               | 134    | 18.9 |
| Pre-diabetes 2 (self-reported no diabetes & $5.7\% \leq$ HbA1c<6.5%)                                 | 353    | 49.9 |
| Pre-diabetes 3 (self-reported no diabetes & ' $5.6 \leq$ FPG<7.0 mmol/L or $5.7\% \leq$ HbA1c<6.5%') | 389    | 54.9 |
| Glycemic control                                                                                     |        |      |
| Currently taking diabetes medication in diagnosed diabetes                                           | 66     | 90.4 |
| FPG <7.0 mmol/L & HbA1c <6.5% in diagnosed diabetes                                                  | 12     | 16.4 |
| FPG <7.0 mmol/L & HbA1c <6.5% in diagnosed diabetes with currently taking diabetes medication        | 10     | 15.2 |
| FPG <7.0 mmol/L & HbA1c <6.5% in diagnosed diabetes but no taking diabetes medication                | 2      | 28.6 |

FPG, fasting plasma glucose; HbA1c, glycated hemoglobin.
